# Supplementary material for: Inihibition of Glycolysis by Using a Micro/Nano-Lipid Bromopyruvic Chitosan Carrier as a Promising Tool to Improve Treatment of Hepatocellular Carcinoma
Source: PubMed Central journal article supplement (PMC5791121; doi:10.3390/nano8010034), 2018-01-10
Supplement: nanomaterials-08-00034-s001.pdf [file nanomaterials-08-00034-s001.pdf]

# Inhibition of Glycolysis by Using a Micro/Nano-Lipid Bromopyruvic Chitosan Carrier as a Promising Tool to Improve Treatment of Hepatocellular Carcinoma

Nemany A. Hanafy <sup>1,2,†</sup>, Luciana Dini <sup>3</sup>, Cinzia Citti <sup>1,3</sup>, Giuseppe Cannazza <sup>3,4</sup> and Stefano Loporatti <sup>1,\*</sup>

<sup>1</sup> CNR NANOTEC-Istituto di Nanotecnologia, 73100 Lecce, Italy; nemany.hanafy@nanotec.cnr.it (N.A.H.); cinzia.citti@gmail.com (C.C.)

<sup>2</sup> Department of Mathematics and Physics "E. De Giorgi", University of Salento, 73100 Lecce, Italy

<sup>3</sup> Department of Biological and Environmental Sciences and Technologies (DiSTeBA), University of Salento, 73100 Lecce, Italy; luciana.dini@unisalento.it (L.D.); giuseppe.cannazza@unimore.it (G.C.)

<sup>4</sup> Life Science Department, University of Modena e Reggio Emilia, 41121 Modena, Italy

† Present Address: Sohag Cancer Center, 82511 Sohag, Egypt; and Institute of Nanoscience and Nanotechnology, Kafrelsheikh University, 33516 Kafr ElSheikh, Egypt.

\* Correspondence: stefano.leporatti@nanotec.cnr.it; Tel.: +39-0832-319829

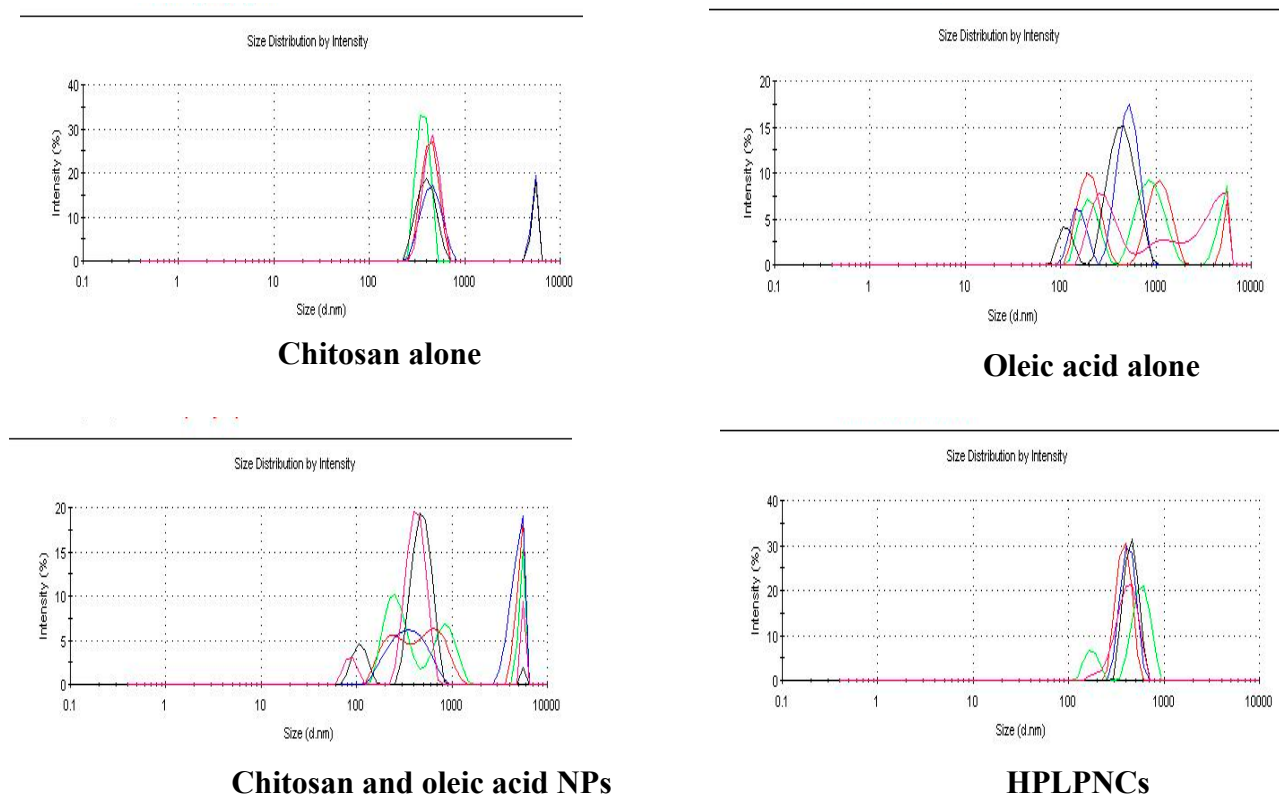

**Figure S1.** Size distribution of used materials. Dynamic light scattering (DLS) investigation of different materials used for producing micro/nanolipid carriers (chitosan alone, oleic acid alone, chitosan and oleic acid NPs, and HPLPNCs).
